# Supplementary material
Source: PubMed Central journal article supplement (PMC7222908)
Supplement: 12630_2019_1525_MOESM2_ESM.pdf [file 12630_2019_1525_MOESM2_ESM.pdf]

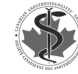
**eAPPENDIX 2      Data extraction form**

| Data                                                                                                                                                   | Extractor #1 | Extractor #2 |
|--------------------------------------------------------------------------------------------------------------------------------------------------------|--------------|--------------|
| <ul style="list-style-type: none"> <li>Type of health economic evaluation</li> </ul>                                                                   |              |              |
| <ul style="list-style-type: none"> <li>Perspective</li> </ul>                                                                                          |              |              |
| <ul style="list-style-type: none"> <li>Time horizon</li> </ul>                                                                                         |              |              |
| <ul style="list-style-type: none"> <li>Year of study and currency</li> </ul>                                                                           |              |              |
| <ul style="list-style-type: none"> <li>Patient group</li> </ul>                                                                                        |              |              |
| <ul style="list-style-type: none"> <li>Probiotic genus/species and comparators</li> </ul>                                                              |              |              |
| <ul style="list-style-type: none"> <li>Clinical outcomes</li> </ul>                                                                                    |              |              |
| <ul style="list-style-type: none"> <li>Incremental effects as 'events avoided', 'life-years' or quality adjusted life-years (QALYs) gained'</li> </ul> |              |              |
| <ul style="list-style-type: none"> <li>Health care resource uses and unit costs (including source articles)</li> </ul>                                 |              |              |
| <ul style="list-style-type: none"> <li>Incremental costs or incremental cost-effectiveness ratio</li> </ul>                                            |              |              |
| <ul style="list-style-type: none"> <li>Results of any sensitivity analyses</li> </ul>                                                                  |              |              |
| <ul style="list-style-type: none"> <li>Country in which the study was performed</li> </ul>                                                             |              |              |
| <ul style="list-style-type: none"> <li>Declared source of funding</li> </ul>                                                                           |              |              |
