# Supplementary material
Source: PubMed Central journal article supplement (PMC7222908)
Supplement: 12630_2019_1525_MOESM5_ESM.pdf [file 12630_2019_1525_MOESM5_ESM.pdf]

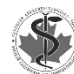

eAppendix 5 Costing data (natural units, unit costs and/or total costs)

| Cost Variable (Total Cost)                              | Allen et. al (2013)                                                                                                              | Branch-Elliman et. al (2015)                                  | Fansi et. al (2012)***                                                                                                                     | Leal et. al (2016)                                                                                                                             | Lenoir-Wijnkoop et. al (2014)*** | Shen et. al (2017)                                                                                        | Vermeersch et. al (2018)***                                                    |
|---------------------------------------------------------|----------------------------------------------------------------------------------------------------------------------------------|---------------------------------------------------------------|--------------------------------------------------------------------------------------------------------------------------------------------|------------------------------------------------------------------------------------------------------------------------------------------------|----------------------------------|-----------------------------------------------------------------------------------------------------------|--------------------------------------------------------------------------------|
| <b>Diagnostics/Procedures</b>                           |                                                                                                                                  |                                                               |                                                                                                                                            |                                                                                                                                                |                                  |                                                                                                           |                                                                                |
| Microbiology testing                                    | £45.28-54.94 [27.51-109.88] (unit)<br>\$88.24-107.07 CDN [53.61-214.13] [NHS Reference Costs, Curtis L.]                         | NR                                                            | \$32.16 USD (\$45.67 CDN) (unit, Clostridium Difficile screen) [Hospital database]                                                         | \$30.31 CDN (\$31.52) (unit, Clostridium Difficile Quick Check Complete Assay (2-step algorithm test)) [Calgary Laboratory Services]           | NR                               | NR                                                                                                        | NR                                                                             |
| Diagnostic and therapeutic protocols                    | £69.65 (\$135.73 CDN) (unit) [NHS Reference Costs, Curtis L.]                                                                    | NR                                                            | NR                                                                                                                                         | NR                                                                                                                                             | NR                               | NR                                                                                                        | NR                                                                             |
| CBC                                                     | NR                                                                                                                               | NR                                                            | NR                                                                                                                                         | NR                                                                                                                                             | NR                               | NR                                                                                                        | NR                                                                             |
| Urea/WBC/LFT                                            | NR                                                                                                                               | NR                                                            | NR                                                                                                                                         | NR                                                                                                                                             | NR                               | NR                                                                                                        | NR                                                                             |
| CRP                                                     | NR                                                                                                                               | NR                                                            | NR                                                                                                                                         | NR                                                                                                                                             | NR                               | NR                                                                                                        | NR                                                                             |
| Abdominal XR                                            | NR                                                                                                                               | NR                                                            | NR                                                                                                                                         | NR                                                                                                                                             | NR                               | NR                                                                                                        | NR                                                                             |
| Flexible Sigmoidoscopy                                  | NR                                                                                                                               | NR                                                            | NR                                                                                                                                         | NR                                                                                                                                             | NR                               | NR                                                                                                        | NR                                                                             |
| Stool Culture (Toxin/WBC/C&S/Clostridium Difficile PCR) | NR                                                                                                                               | NR                                                            | NR                                                                                                                                         | NR                                                                                                                                             | NR                               | NR                                                                                                        | NR                                                                             |
| Fecal transplant                                        | NR                                                                                                                               | NR                                                            | NR                                                                                                                                         | NR                                                                                                                                             | NR                               | \$3150 USD [1580-4730] (\$4313.48 CDN [2163.59-6477.07]) (total) [Redbook, HCUP]                          | NR                                                                             |
| Colectomy                                               | NR                                                                                                                               | NR                                                            | NR                                                                                                                                         | NR                                                                                                                                             | NR                               | \$37290 USD [18650-55940] (\$51063.38 CDN [25538.54-76601.92]) (total) [Konejeti et al.]                  | NR                                                                             |
| <b>Medication/Drugs</b>                                 |                                                                                                                                  |                                                               |                                                                                                                                            |                                                                                                                                                |                                  |                                                                                                           |                                                                                |
| Antibiotics                                             | Probiotic: £865.09 (\$1685.86 CDN)<br>Placebo: £829.29 (\$1616.10 CDN) (total, including staff time) [Joint Formulary Committee] | NR                                                            | \$0.23 USD (\$0.33 CDN) (Metronidazole, per dose - unit)<br>\$11.76 USD (\$16.70 CDN) (Vancomycin, per dose - unit) [Consumer Price Index] | \$0.37 CDN (\$0.38) (Metronidazole, per capsule - unit)<br>\$4.76 CDN (\$4.95) (Vancomycin, per day - unit) [Alberta Health Services Pharmacy] | NR                               | \$1490 USD [750-2240] (\$2040.34 CDN [1027.02-3067.36]) (Vancomycin, full course - total) [Redbook, HCUP] | NR                                                                             |
| Probiotics                                              | Probiotic: £73.02 (\$142.30 CDN),<br>Placebo: £0.00 (\$0.0)                                                                      | \$2.18 USD [Range: \$1-10] (\$3.09 CDN [Range: \$1.42-14.16]) | \$2.50 USD (\$3.55 CDN) (Lactobacillus acidophilus/casei, per dose - unit)                                                                 | \$1.57 CDN (\$1.63) Probiotics (per day - unit) [Alberta Health Services Pharmacy]                                                             | NR                               | \$70 USD [40-110] (\$95.86 CDN [54.77-150.63]) (full course - total) [Redbook, HCUP]                      | €12.40 (\$18.67 CDN) ( <i>S. Boulardii</i> CNCM I-745) [Elseviers/RIZIV/ NAMI] |

|                              | (total, including staff time)<br>[Joint Formulary Committee]                                                                   | (unit)<br>[Pharmacy Red Book]                                                                          | [Consumer Price Index] |    |                                                                                                                                                                                                                                                                                                                  |    |    |
|------------------------------|--------------------------------------------------------------------------------------------------------------------------------|--------------------------------------------------------------------------------------------------------|------------------------|----|------------------------------------------------------------------------------------------------------------------------------------------------------------------------------------------------------------------------------------------------------------------------------------------------------------------|----|----|
| Medications                  | NR                                                                                                                             | NR                                                                                                     | NR                     | NR | Non-Severe:<br>£35 (\$66.50 CDN)<br>(CDAD) vs.<br>£1 (\$1.90 CDN) (non-CDAD)<br>Severe:<br>£92 (\$174.80 CDN)<br>(CDAD) vs.<br>£2 (\$3.80 CDN) (non-CDAD)<br>(unit)<br>[British National Formulary, 2009;<br>Department of Health Reference Costs, 2009/10;<br>PSSRU Unit Costs of Health and Social Care, 2010] | NR | NR |
| Diarrhea Treatment           | Probiotic:<br>£4531.36<br>(\$8830.59 CDN)<br>Placebo:<br>£473.23<br>(\$922.22 CDN)<br>(total)<br>[Joint Formulary Committee]   | NR                                                                                                     | NR                     | NR | NR                                                                                                                                                                                                                                                                                                               | NR | NR |
| AAD Treatment                | Probiotic:<br>£1742.15<br>(\$3395.05 CDN)<br>Placebo:<br>£2220.38<br>(\$4327.01 CDN)<br>(total)<br>[Joint Formulary Committee] | NR                                                                                                     | NR                     | NR | NR                                                                                                                                                                                                                                                                                                               | NR | NR |
| Oral decontamination         | NR                                                                                                                             | \$13.30 USD<br>[Range: 5-25]<br>(\$18.84 CDN<br>[Range: 7.08-35.40])<br>(unit)<br>[Pharmacy Red Book]  | NR                     | NR | NR                                                                                                                                                                                                                                                                                                               | NR | NR |
| Digestive decontamination    | NR                                                                                                                             | \$17.92 USD<br>[Range: 9-45]<br>(\$25.38 CDN<br>[Range: 12.75-63.73])<br>(unit)<br>[Pharmacy Red Book] | NR                     | NR | NR                                                                                                                                                                                                                                                                                                               | NR | NR |
| <b>Devices/Equipment</b>     |                                                                                                                                |                                                                                                        |                        |    |                                                                                                                                                                                                                                                                                                                  |    |    |
| Cleaning/laundry/disposables | £57.15-95.73                                                                                                                   | NR                                                                                                     | NR                     | NR | NR                                                                                                                                                                                                                                                                                                               | NR | NR |

|                             |                                                                                                             |                                                                                                                 |    |                                                              |    |    |    |
|-----------------------------|-------------------------------------------------------------------------------------------------------------|-----------------------------------------------------------------------------------------------------------------|----|--------------------------------------------------------------|----|----|----|
|                             | (\$111.37-186.56<br>CDN)<br>(unit)<br>[NHS Reference<br>Costs, Curtis L.]                                   |                                                                                                                 |    |                                                              |    |    |    |
| Gowns                       | NR                                                                                                          | NR                                                                                                              | NR | \$21.88 CDN (\$22.76)<br>(gowns per day – unit)<br>[AHS IPC] | NR | NR | NR |
| Gloves                      | NR                                                                                                          | NR                                                                                                              | NR | \$7.15 CDN (\$7.44)<br>(gloves per day – unit)<br>[AHS IPC]  | NR | NR | NR |
| Terminal cleaning           | £20.76 [16.61-<br>24.91]<br>(\$40.45 CDN<br>[32.37-48.54])<br>(unit)<br>[NHS Reference<br>Costs, Curtis L.] | NR                                                                                                              | NR | \$24.08 CDN (\$25.04)<br>(total)<br>[AHS IPC]                | NR | NR | NR |
| Daily cleaning              | £9.54 [7.63-<br>11.45]<br>(\$18.59 CDN<br>[14.87-22.31])<br>(unit)<br>[NHS Reference<br>Costs, Curtis L.]   | NR                                                                                                              | NR | NR                                                           | NR | NR | NR |
| Spot cleaning &<br>changing | £32.85 [26.28-<br>39.42]<br>(\$64.02 CDN<br>[51.21-76.82])<br>(unit)<br>[NHS Reference<br>Costs, Curtis L.] | NR                                                                                                              | NR | NR                                                           | NR | NR | NR |
| Standard ETT                | NR                                                                                                          | \$3.07 USD<br>[Range: 0-10]<br>(\$4.35 CDN<br>[Range: 0-<br>14.16])<br>(unit)<br>[Manufacturer]                 | NR | NR                                                           | NR | NR | NR |
| Silver ETT                  | NR                                                                                                          | \$50 USD<br>[Range: 30-60]<br>(\$70.81 CDN<br>[Range: 42.49-<br>84.97])<br>(unit)<br>[Manufacturer]             | NR | NR                                                           | NR | NR | NR |
| Suction ETT                 | NR                                                                                                          | \$17.16 USD<br>[Range: 10-<br>100]<br>(\$24.30 CDN<br>[Range: 14.16-<br>141.62])<br>(unit)<br>[Manufacturer]    | NR | NR                                                           | NR | NR | NR |
| VAP bundle                  | NR                                                                                                          | \$33.32 USD<br>[Range: 33.32-<br>150]<br>(\$47.19 CDN<br>[Range: 47.19-<br>212.43])<br>(unit)<br>[Manufacturer] | NR | NR                                                           | NR | NR | NR |
| Oral care                   | NR                                                                                                          | \$38 USD<br>[Range: 38-<br>150]<br>(\$53.81 CDN<br>[Range: 53.81-<br>212.43])<br>(unit)<br>[Manufacturer]       | NR | NR                                                           | NR | NR | NR |

|                        |                                                                                                                               |                                                                                                                                                                                 |    |                                                                                     |                                                                                                                                                                                                                                                                                                                                                                                                                                                                                                                                                                                                                                                |                                                                                                                                                                   |                                                                                      |
|------------------------|-------------------------------------------------------------------------------------------------------------------------------|---------------------------------------------------------------------------------------------------------------------------------------------------------------------------------|----|-------------------------------------------------------------------------------------|------------------------------------------------------------------------------------------------------------------------------------------------------------------------------------------------------------------------------------------------------------------------------------------------------------------------------------------------------------------------------------------------------------------------------------------------------------------------------------------------------------------------------------------------------------------------------------------------------------------------------------------------|-------------------------------------------------------------------------------------------------------------------------------------------------------------------|--------------------------------------------------------------------------------------|
| VAP bundle & oral care | NR                                                                                                                            | \$71.32 USD<br>[Range: \$71-300]<br>(\$101.00 CDN<br>[Range:<br>100.55-424.85])<br>(unit)<br>[Manufacturer]                                                                     | NR | NR                                                                                  | NR                                                                                                                                                                                                                                                                                                                                                                                                                                                                                                                                                                                                                                             | NR                                                                                                                                                                | NR                                                                                   |
| <b>Personnel</b>       |                                                                                                                               |                                                                                                                                                                                 |    |                                                                                     |                                                                                                                                                                                                                                                                                                                                                                                                                                                                                                                                                                                                                                                |                                                                                                                                                                   |                                                                                      |
| Physician costs        | £194.76<br>[103.01-259.67]<br>(\$379.54 CDN<br>[200.74-506.40])<br>(unit)<br>[NHS Reference<br>Costs, Curtis L.]              | NR                                                                                                                                                                              | NR | NR                                                                                  | Non-Severe:<br>£141<br>(\$267.90<br>CDN)<br>(CDAD) vs.<br>£74 (\$140.60<br>CDN) (non-<br>CDAD)<br>Severe:<br>£192<br>(\$364.80<br>CDN)<br>(CDAD) vs.<br>£147<br>(\$279.30<br>CDN) (non-<br>CDAD)<br>(consultation<br>– unit)<br>£36.5<br>(\$69.35 CDN)<br>(specialist<br>referral –<br>unit)<br>£47 (\$89.30<br>CDN)<br>(GP referral –<br>unit)<br>£6.9 (\$13.11<br>CDN)<br>(junior doctor<br>– unit)<br>£43.8<br>(\$83.22 CDN)<br>(gastroenterol<br>ogy – unit)<br>[British<br>National<br>Formulary,<br>2009;<br>Department<br>of Health<br>Reference<br>Costs,<br>2009/10;<br>PSSRU Unit<br>Costs of<br>Health and<br>Social Care,<br>2010] | \$210 USD [110-320]<br>(\$287.57 CDN<br>[150.63-438.19])<br>(specialist referral –<br>unit)<br>[Centers for<br>Medicare and<br>Medicaid Services<br>Fee Schedule] | NR                                                                                   |
| Nurse costs            | Probiotic:<br>£105.38<br>(\$205.36 CDN)<br>Placebo: £90.94<br>(\$177.22 CDN)<br>(unit)<br>[NHS Reference<br>Costs, Curtis L.] | \$33.32 USD<br>[Range: 25-<br>120]<br>(\$47.19 CDN<br>[Range: 35.40-<br>169.94])<br>(unit – per hour)<br>[US Department<br>of Labor<br>Statistics<br>(median nursing<br>wages)] | NR | \$34.83 CDN (\$36.22)<br>(Nurse donning/doffing<br>PPE per day – unit)<br>[AHS IPC] | £10 (\$19<br>CDN)<br>(district nurse<br>– unit)<br>[British<br>National<br>Formulary,<br>2009;<br>Department<br>of Health<br>Reference<br>Costs,                                                                                                                                                                                                                                                                                                                                                                                                                                                                                               | NR                                                                                                                                                                | € 0.63 (\$0.95<br>CDN)/minute<br>nursing time<br>spent<br>[Elseviers/RIZIV/<br>NAMI] |

|                            |                                                                                                                                     |    |                                                                                                                                  |    |                                                                                                                                                                                                                                                                                                                             |    |                                             |
|----------------------------|-------------------------------------------------------------------------------------------------------------------------------------|----|----------------------------------------------------------------------------------------------------------------------------------|----|-----------------------------------------------------------------------------------------------------------------------------------------------------------------------------------------------------------------------------------------------------------------------------------------------------------------------------|----|---------------------------------------------|
|                            |                                                                                                                                     |    |                                                                                                                                  |    | 2009/10;<br>PSSRU Unit<br>Costs of<br>Health and<br>Social Care,<br>2010]                                                                                                                                                                                                                                                   |    |                                             |
| Allied staff costs         | Probiotic:<br>£759.71<br>(\$1480.50 CDN)<br>Placebo:<br>£738.34<br>(\$1438.86 CDN)<br>(unit)<br>[NHS Reference<br>Costs, Curtis L.] | NR | NR                                                                                                                               | NR | £45 (\$85.50<br>CDN)<br>(pharmacist –<br>unit)<br>[British<br>National<br>Formulary,<br>2009;<br>Department<br>of Health<br>Reference<br>Costs,<br>2009/10;<br>PSSRU Unit<br>Costs of<br>Health and<br>Social Care,<br>2010]                                                                                                | NR | NR                                          |
| Societal productivity loss | NR                                                                                                                                  | NR | NR                                                                                                                               | NR | NR                                                                                                                                                                                                                                                                                                                          | NR | €290.22 (\$437.00<br>CDN)/day<br>[Cleemput] |
| <b>Hospital Cost</b>       |                                                                                                                                     |    |                                                                                                                                  |    |                                                                                                                                                                                                                                                                                                                             |    |                                             |
| Lost bed day (closure)     | £334.17<br>(\$651.22 CDN)<br>(unit)<br>[NHS Reference<br>Costs, Curtis L.]                                                          | NR | NR                                                                                                                               | NR | NR                                                                                                                                                                                                                                                                                                                          | NR | NR                                          |
| Ward closure               | £9356.76<br>(\$18234.19<br>CDN) (unit)<br>[NHS Reference<br>Costs, Curtis L.]                                                       | NR | NR                                                                                                                               | NR | NR                                                                                                                                                                                                                                                                                                                          | NR | NR                                          |
| Diarrhea (case per day)    | £81.40 (\$158.05<br>CDN)<br>(unit)<br>[NHS Reference<br>Costs, Curtis L.]                                                           | NR | NR                                                                                                                               | NR | NR                                                                                                                                                                                                                                                                                                                          | NR | NR                                          |
| Hospital in-patient day    | £267.34-401.00<br>(\$520.98-781.46<br>CDN)<br>(unit)<br>[NHS Reference<br>Costs, Curtis L.]                                         | NR | \$1424.16 USD<br>(\$2022.31 CDN)<br>(Hospital care for<br>CDAD patient per day<br>hospitalized)<br>(unit)<br>[Hospital database] | NR | Non-Severe:<br>£2268<br>(\$4309.20<br>CDN)<br>(CDAD) vs.<br>£1614<br>(\$3066.60)<br>(non-CDAD)<br>Severe:<br>£5588<br>(\$10617.20<br>CDN)<br>(CDAD) vs.<br>£2897<br>(\$5504.30<br>CDN)<br>(non-CDAD)<br>(unit)<br>[British<br>National<br>Formulary,<br>2009;<br>Department<br>of Health<br>Reference<br>Costs,<br>2009/10; | NR | NR                                          |

|              |    |                                                                                                                                                  |    |    |                                                                                                                                                              |                                                                                                                                                  |                                                                                                                                     |
|--------------|----|--------------------------------------------------------------------------------------------------------------------------------------------------|----|----|--------------------------------------------------------------------------------------------------------------------------------------------------------------|--------------------------------------------------------------------------------------------------------------------------------------------------|-------------------------------------------------------------------------------------------------------------------------------------|
|              |    |                                                                                                                                                  |    |    | PSSRU Unit Costs of Health and Social Care, 2010]                                                                                                            |                                                                                                                                                  |                                                                                                                                     |
| General ward | NR | NR                                                                                                                                               | NR | NR | £530 (\$1007 CDN) (unit) [British National Formulary, 2009; Department of Health Reference Costs, 2009/10; PSSRU Unit Costs of Health and Social Care, 2010] | NR                                                                                                                                               | NR                                                                                                                                  |
| Single ward  | NR | NR                                                                                                                                               | NR | NR | £479 (\$910 CDN) (unit) [British National Formulary, 2009; Department of Health Reference Costs, 2009/10; PSSRU Unit Costs of Health and Social Care, 2010]  | NR                                                                                                                                               | NR                                                                                                                                  |
| VAP Cost     | NR | \$15975 [Range: 7000-35000] (\$22623.38 CDN [Range: 9913.22-49566.09]) (total) [Safdar, Restrepo, Kolley, Institute for Health Care Improvement] | NR | NR | NR                                                                                                                                                           | NR                                                                                                                                               | NR                                                                                                                                  |
| AAD cost     | NR | NR                                                                                                                                               | NR | NR | NR                                                                                                                                                           | NR                                                                                                                                               | €1250.60 [277.40-2150.3] (\$1883.08 CDN [417.69-3237.79]) (bottom up) €1248.7 (\$1880.22 CDN) (top-down) [Elseviers/RIZIV/I NAMI]   |
| CDAD cost    | NR | NR                                                                                                                                               | NR | NR | NR                                                                                                                                                           | \$7670 USD [3830-11500] (\$10502.98 CDN [5244.64-15747.62]) (inpatient cost per case – total) \$440 USD [210-620] (\$602.52 CDN [287.57-849.00]) | €1339.50 [588.80-2239.10] (\$2016.94 CDN [866.58-3371.50]) (bottom up) €1337.50 (\$2013.93 CDN) (top-down) [Elseviers/RIZIV/I NAMI] |

|                                       |                                                                                                                                       |    |    |                                                  |    |                                                                                       |                                                            |
|---------------------------------------|---------------------------------------------------------------------------------------------------------------------------------------|----|----|--------------------------------------------------|----|---------------------------------------------------------------------------------------|------------------------------------------------------------|
|                                       |                                                                                                                                       |    |    |                                                  |    | (outpatient cost per case – total)<br>[Redbook, HCUP]                                 |                                                            |
| CDAD Relapse (one-time cost)          | NR                                                                                                                                    | NR | NR | NR                                               | NR | NR                                                                                    | €11868.50 (\$17870.88 CDN)/episode [Elseviers/RIZIV/INAMI] |
| Probiotic induced bacteremia/fungemia | NR                                                                                                                                    | NR | NR | NR                                               | NR | \$18280 USD [9140-27420] (\$25031.87 CDN [12515.94-37547.81]) (total) [Redbook, HCUP] | NR                                                         |
| Isolation room                        | NR                                                                                                                                    | NR | NR | \$41.67 CDN (\$43.34) (per day – unit) [AHS IPC] | NR | NR                                                                                    | €133.89 (\$201.60 CDN)/day [Elseviers/RIZIV/INAMI]         |
| Total Cost                            | Probiotic:<br>£8020.11 (\$15629.36 CDN)<br>Placebo:<br>£8011.37 (\$15612.33 CDN)<br>(CDAD, total)<br>[NHS Reference Costs, Curtis L.] | NR | NR | NR                                               | NR | NR                                                                                    | NR                                                         |

**AAD:** Antibiotic associated diarrhea, **AHS:** Alberta Health Services, **C&S:** Culture and sensitivity, **CBC:** complete blood count, **CDAD:** *Clostridium Difficile* associated diarrhea, **CRP:** C-reactive protein, **ETT:** Endotracheal tube, **Euro: €**, **GBP:** Great Britian Pound (£), **HCUP:** Healthcare Cost and Utilization Project, **IPC:** Infection Prevention and Control, **LFT:** liver function tests, **NHS:** National Health Service, **PCR:** polymerase chain reaction, **PPE:** personal protective equipment, **PSSRU:** Personal Social Services Research Unit, **RIZIV/INAMI:** National Institute for Health and Disability Insurance, **US:** United States, **VAP:** ventilator associated pneumonia, **WBC:** white blood cell count, **XR:** X-ray  
[Ranges] in brackets/square parentheses (if reported)

\*\*\* - industry sponsored study
